# Supplementary material for: Ultradeep 16S rRNA Sequencing Analysis of Geographically Similar but Diverse Unexplored Marine Samples Reveal Varied Bacterial Community Composition
Source: PLoS One. 2013 Oct 22;8(10):e76724. doi: 10.1371/journal.pone.0076724 (PMC3805540; doi:10.1371/journal.pone.0076724)
Supplement: Table S6 — This file contains the details of shared and specific abundant species among the five samples in the first sheet and the details of shared and specific rare species among the samples in the second sheet. (XLS) [file pone.0076724.s012.xls]

## Sheet: Abundant species
Table S6. Details of Shared and Specific abundant species in R-SED, M-SED, SR, SW and SG
Common species in R-SED, M-SED, SR, SW and SG	Species only in M-SED	Species only in R-SED	Species only in SR	Species only in SW	Species only in SG
uncultured bacterium	Bacillus firmus	Vibrio aestuarianus	Desulfosalina propionicus	Flavobacteria bacterium MS024-2A	Spirochaeta zuelzerae
uncultured delta proteobacterium	Bacillus pumilus	Petrotoga mobilis	uncultured Desulfovibrio sp.	Microbacterium terregens	Treponema lecithinolyticum
uncultured alpha proteobacterium	Bacillus indicus	Roseospirillum parvum	Chlorobium limicola	Marinobacter hydrocarbonoclasticus	Neisseria sicca
uncultured gamma proteobacterium	Carnobacterium maltaromaticum	Gluconacetobacter hansenii	Enterorhabdus caecimuris	Mycobacterium neoaurum	Desulfonauticus autotrophicus
Agrobacterium tumefaciens	Bacillus aquimaris	Thermanaerovibrio acidaminovorans	Desulfuromonas acetoxidans	Halomonas aquamarina	Megamonas hypermegale
Dyella japonica	Bacillus circulans	Cytophaga sp. MBIC04693	Desulfuromonas chloroethenica	Vibrio neptunius	Neisseria flavescens
uncultured proteobacterium	Bacillus coahuilensis	Listonella anguillarum	Thermodesulfobacterium thermophilum	beta proteobacterium KB13	Eubacterium ventriosum
Methylococcus capsulatus	Dialister pneumosintes	Alkaliphilus transvaalensis	Geminocystis herdmanii	Nocardioides albus	uncultured Desulfobulbaceae bacterium
Frankia sp.	Bacillus pseudomycoides	Reinekea blandensis	Paenibacillus pabuli	Marinomonas sp. MED121	Desulfotomaculum reducens
Candidatus Liberibacter asiaticus	Bacillus niacini	Microbacterium dextranolyticum	Heliobacterium chlorum	Pseudoalteromonas sp. A28	Novospirillum itersonii
Rhodopseudomonas palustris	Bacillus sp. w5	Microscilla marina	uncultured Geobacter sp.	Alteromonas macleodii	Cronobacter turicensis
Desulfuromonadales bacterium Tc37	Bacillus infernus	Clostridium ultunense	Thermodesulfovibrio islandicus	Geobacillus stearothermophilus	Neisseria flava
Ochrobactrum tritici	Halobacillus faecis	gamma proteobacterium HRh1	Cyanobacterium sp. MBIC10216	Tetrasphaera jenkinsii	Pseudovibrio sp. JE062
uncultured marine bacterium	Halobacillus dabanensis	Vibrio sp. 0908	Caldanaerobacter subterraneus	Xanthomonas oryzae	Bacteroides sp. 1AL
Bartonella grahamii	Veillonella dispar	Alkalispirillum sp. Z 7008	Halarsenatibacter silvermanii	Comamonas aquatica	Sagittula stellata
Saccharopolyspora rectivirgula	Bacillus azotoformans	Mycobacterium elephantis	Alcaligenes sp. STC1	Comamonas testosteroni	Ruminococcus gnavus
Halorhodospira halophila	Acidaminococcus sp. D21	Leeuwenhoekiella blandensis	Nocardiopsis baichengensis	Micrococcus luteus	Roseovarius nubinhibens
Saccharopolyspora spinosa	Chromobacterium pseudoviolaceum	Dehalococcoides ethenogenes	Bacillus schlegelii	Geobacillus sp. 70PC53	Anabaenopsis elenkinii
Desulfovibrio alaskensis	Serratia marcescens	uncultured Dehalococcoides sp.	Acidimicrobium ferrooxidans	Sweet potato little leaf phytoplasma	Anaerostipes caccae
Flexithrix dorotheae	Bacillus catenulatus	Mycobacterium sp. JS624	Leifsonia shinshuensis	Brevibacillus borstelensis	Clostridium sp. SS2/1
Sphingomonas melonis	Vibrio campbellii	Kordiimonas gwangyangensis	Bordetella holmesii	Exiguobacterium aurantiacum	Micrococcus lylae
Klebsiella pneumoniae	uncultured Serratia sp.	Azospirillum amazonense	Nitrococcus mobilis	Anoxybacillus kestanbolensis	Oligobrachia mashikoi endosymbiont F
Cyclobacterium marinum	Megasphaera elsdenii	Halothiobacillus kellyi	Pseudanabaena sp. PCC 7367	Alteromonas sp. UST981101-023	Clostridium xylanolyticum
Legionella pneumophila	Halobacillus kuroshimensis	Halomonas halophila	Roseburia intestinalis	Thalassobius gelatinovorus	Verminephrobacter eiseniae
Propionibacterium freudenreichii	Listeria monocytogenes	Vibrio mytili	Chamaesiphon subglobosus	Brevibacillus brevis	Synechococcus sp. G2.1
Paracoccus sp. R-24652	Bacillus clausii	candidate division TM7 single-cell isolate TM7a	Synechococcus sp. P2	Oceanobacillus picturae	Mariprofundus ferrooxydans
Photobacterium damselae	Carnobacterium sp. AT7	magnetite-containing magnetic vibrio	Peptoniphilus lacrimalis	Staphylococcus haemolyticus	Desulfotomaculum thermosapovorans
Sphingobium yanoikuyae	Virgibacillus koreensis	Novosphingobium nitrogenifigens	Anaerofustis stercorihominis	Microbacterium aurum	Methyloversatilis universalis
uncultured epsilon proteobacterium	Pantoea agglomerans	uncultured Methylobacter sp.	Olavius algarvensis associated proteobacterium Delta 3	Exiguobacterium sp. AT4	Clostridiales genomosp. BVAB3
Hahella chejuensis	Bacillus sp. TB104	Rhodothalassium salexigens	Desulfobacter curvatus	Halomonas ventosae	uncultured Acidovorax sp.
Escherichia albertii	Bacillus sporothermodurans	Microbulbifer hydrolyticus	Pseudonocardia zijingensis	Paracoccus marcusii	Aeromonas hydrophila
Gluconobacter oxydans	Bacillus lentus	Vibrio sp. R-78	Neochlamydia hartmannellae	Rhodospirillum sulfurexigens	Bifidobacterium pseudocatenulatum
Thioclava pacifica	Bacillus vedderi	Kribbella jejuensis	Clostridium purinilyticum	Micrococcus sp. TS17	Xenococcus sp. PCC 7305
uncultured Rhodobacteraceae bacterium	Terribacillus halophilus	Halobacillus salinus	Dolichospermum circinale	Francisella tularensis	Kingella kingae
Salipiger mucosus	Bacillus sp. JL-26	Chlorobaculum macestae	Leptotrichia wadei	Microbacterium schleiferi	Francisella noatunensis
Cytophaga sp. I-762	Bacillus sp. PL-16	Eubacterium rectale	Spirulina subsalsa	Marinobacter sp. HB7	Bifidobacterium angulatum
Thauera sp. MZ1T	Paenibacillus polymyxa	Geothermobacter ehrlichii	Psychroflexus gondwanensis	Vibrio sp. FALF296	Synechococcus sp. PCC 8806
Halothiobacillus neapolitanus	Buttiauxella agrestis	Okibacterium fritillariae	Waddlia chondrophila	Idiomarina baltica	Desulfotalea psychrophila
Zymomonas mobilis	Bacillus macroides	Mycobacterium sp. JLS	Geitlerinema sp. Flo1	Candidatus Rhodoluna lacicola	Pseudobutyrivibrio xylanivorans
Coxiella burnetii	Bacillus psychrosaccharolyticus	Mycobacterium sp. KMS	Clostridium limosum	Simkania negevensis	Neisseria meningitidis
Nitrosococcus oceani	Lactobacillus sakei	Vibrio halioticoli	Rhodopirellula sp. SM50	Corynebacterium auris	Oceanicola granulosus
uncultured soil bacterium	Yersinia pestis	Streptomyces africanus	uncultured Desulfovibrionales bacterium	Brevibacillus parabrevis	Legionella cincinnatiensis
Xanthomonas axonopodis	Veillonella parvula	Methylosinus acidophilus	Synechococcus sp. WH 8102	Methylarcula marina	Flexibacter elegans
Saccharopolyspora hirsuta	Halobacillus locisalis	Clostridium sticklandii	Shuttleworthia satelles	Paenibacillus naphthalenovorans	Clostridium polysaccharolyticum
Rhodovulum marinum	Virgibacillus halodenitrificans	Lentisphaera araneosa	Candidatus Desulforudis audaxviator	Rhodobacterales bacterium CB1025	Variovorax paradoxus
Robiginitalea biformata	Bacillus mojavensis	Alcanivorax hongdengensis	Thermus aquaticus	uncultured Pseudomonas sp.	Aeromonas sp. 12m
uncultured Rhizobiales bacterium	Bacillus humi	Desulfohalobium utahense	Alicyclobacillus disulfidooxidans	Brevibacterium linens	Aeromonas sp. 1m
uncultured forest soil bacterium	Halobacillus litoralis	Mycobacterium chelonae	Fusobacterium periodonticum	Alcanivorax sp. S2-11	Campylobacter gracilis
Bartonella bacilliformis	Geobacillus caldoxylosilyticus	Nitratiruptor tergarcus	Isosphaera pallida	Marinosulfonomonas methylotropha	Candidatus Protochlamydia amoebophila
Halothiobacillus hydrothermalis	Halobacillus sp. IS-Hb8	Slackia exigua	Desulfovibrio alkalitolerans	Roseivivax halotolerans	Oscillatoria spongeliae
Aquimarina intermedia	Trichococcus collinsii	Parachlamydia acanthamoebae	Carboxydothermus hydrogenoformans	Paenibacillus sp. YK5	Halothermothrix orenii
Hyphomonas neptunium	Shewanella fidelis	Nesterenkonia sp. AN1	Agromyces mediolanus	Candidatus Neoehrlichia lotoris	Mitsuaria chitosanitabida
Alistipes finegoldii	Kingella denitrificans	Hydrogenovibrio marinus	Clostridium tyrobutyricum	bacterium HTCC8046	Desulfofustis glycolicus
Vibrio alginolyticus	Vibrio sp. 12G01	Vibrio diazotrophicus	Eubacterium limosum	Sulfitobacter guttiformis	Corynebacterium callunae
Loktanella hongkongensis	Vibrio sp. 12G02	Sphingomonas sp.	Fusobacterium equinum	Corynebacterium matruchotii	Bacteroides coprosuis
Halobacillus sp. S19-3	Lactobacillus plantarum	Arthrobacter sp. 'SMCC G993'	Propionigenium modestum	Weeksella virosa	Clostridium sp. enrichment culture clone 7-25
Ruegeria pomeroyi	Vibrio sp. 12B11	Slackia heliotrinireducens	Anabaena ucrainica	Marinobacter koreensis	Mitsuokella multacida
unidentified proteobacterium	Amphibacillus xylanus	Butyrivibrio crossotus	Clostridium carboxidivorans	Idiomarina loihiensis	Candidatus Tremblaya princeps
Methylophaga thiooxydans	Staphylococcus sciuri	Prosthecomicrobium pneumaticum	Clostridium histolyticum	Clostridium malenominatum	Cytophaga sp. MBIC04665
Tenacibaculum mesophilum	Vibrio sp. R-725	Acidiphilium sp. DX1-13	Syntrophothermus lipocalidus	Caulobacter sp. MCS18	Peptoniphilus asaccharolyticus
Cytophaga sp. T-588	Acinetobacter baylyi	Arthrobacter sp. BA-5-17	Desulfovibrio oxyclinae	uncultured Magnetospirillum sp.	Pectinatus cerevisiiphilus
Pseudoruegeria sp. HD-43	Vibrio ponticus	Actinocorallia aurantiaca	Ferrimonas sp. A3B-64-2	Alcanivorax venustensis	Brevundimonas diminuta
Marinoscillum furvescens	Staphylococcus epidermidis		Clostridium magnum	Pseudomonas monteilii	Ferrimonas marina
Prolixibacter bellariivorans	Bacillus sp. N2a		anaerobic bacterium EtOH8	Candidatus Fritschea bemisiae	Leuconostoc lactis
Thauera sp. 28	Photorhabdus asymbiotica		Ruminococcus albus	Nitrosomonas sp. C-56	Clostridium butyricum
Methylobacterium nodulans	Vibrio sp. 12G12		Microcystis wesenbergii	Alicyclobacillus hesperidum	Oceanibulbus indolifex
Rhodospirillum rubrum	Shigella boydii		Clostridium ramosum	uncultured Rhizobium sp.	Thiobacillus denitrificans
Beijerinckia indica	Aneurinibacillus aneurinilyticus		Desulfovibrio sp. LVS-13	Acinetobacter sp. VKPM45	Rhodococcus rhodochrous
Phaeobacter gallaeciensis	Vibrio sp. 12F07		Treponema sp. Ru1	Vibrio sp. R-91	Nostoc sp. 'Peltigera horizontalis cyanobiont'
marine bacterium MBIC1357	Bacillus halmapalus		endosymbiont of Ifremeria nautilei	Ruegeria scottomollicae
Burkholderia phenazinium	Citrobacter koseri		Leptospirillum ferriphilum	uncultured Ralstonia sp.
Flavobacterium sp.	Bacillus sp.		Caulobacter sp. FWC17	Comamonas terrigena
Rikenella microfusus	Bacillus sp. HYC-1-3		Desulfovibrio fructosovorans	Curvibacter putative symbiont of Hydra magnipapillata
Flavobacterium johnsoniae	Geobacillus sp. A60		Thermotoga lettingae	Lethal yellowing phytoplasma
Cytophaga sp.	Photobacterium rosenbergii		actinomycete 7501	Staphylococcus saprophyticus
Bacillus subtilis	Geobacillus thermodenitrificans		Lamprocystis purpurea	Lactobacillus gasseri
Roseobacter sp. MED193	Pediococcus parvulus			Loktanella vestfoldensis
Ruegeria lacuscaerulensis	Roseobacter sp. BS36			Halomonas meridiana
Maricaulis maris	Terribacillus saccharophilus			Rhodobacter sphaeroides
Coenonia anatina	Bacillus sp. PL-30			Alteromonas sp.
Coraliomargarita akajimensis	Citrobacter freundii			Pseudomonas veronii
Collimonas fungivorans	Acinetobacter haemolyticus			Chryseobacterium soldanellicola
Tropheryma whipplei	Macrococcus caseolyticus			Paracoccus seriniphilus
Myroides odoratimimus	Obesumbacterium proteus			Ralstonia mannitolilytica
Arthrobacter chlorophenolicus	Mannheimia haemolytica			Pseudomonas jessenii
Akkermansia muciniphila	Acetobacter pasteurianus			Alcaligenes sp. O-1
Bdellovibrio bacteriovorus	Nereida ignava
Bacteriovorax sp. PS52B	Escherichia vulneris
Rubritalea sp. YM29-130	Vibrio sp. 14C03
gamma proteobacterium NOR51-B	Pediococcus inopinatus
Tenacibaculum maritimum	Photobacterium sp. R-34
Pseudomonas migulae	Amphibacillus sediminis
gamma proteobacterium HTCC5015	Bacillus amyloliquefaciens
Actinobaculum schaalii	Staphylococcus succinus
Shewanella violacea	Virgibacillus pantothenticus
uncultured beta proteobacterium	Neisseria sp. CSL 7565
Synechococcus sp. WH 7803	Vibrio chagasii
Azoarcus sp. BH72	Streptomyces clavuligerus
Kribbella flavida	Bifidobacterium pseudolongum
Cytophaga hutchinsonii	Bacillus sp. MB-5
Gramella forsetii	Streptomyces indiaensis
Acinetobacter genomosp. 13TU	Alicyclobacillus tolerans
Capnocytophaga canimorsus	Bacillus fordii
Elizabethkingia meningoseptica	Bacillus sp. R-33773
Bacillus simplex	Geobacillus thermoglucosidasius
Desulfohalobium retbaense	alpha proteobacterium MBIC3951
Corynebacterium suicordis	Legionella anisa
Sphingobacterium multivorum	Bacillus sp. GB02-2A
Sphingobacteriaceae bacterium SOC A20(36)	Pediococcus ethanolidurans
uncultured Roseobacter sp.	Shewanella benthica
Flavobacterium aquatile
Flavobacterium sp. S1
Verrucomicrobiaceae bacterium CHC12
unidentified marine eubacterium
Propionibacterium thoenii
Leptospirillum ferrooxidans
uncultured Hyphomicrobium sp.
Synechococcus sp. PCC 7920
Prochlorococcus marinus
Cardinium endosymbiont of Encarsia inaron
endosymbiont of Vestimentiferan tubeworm
Roseobacter sp. AzwK-3b
Brachybacterium faecium
Candidatus Ruthia magnifica
Bacillus licheniformis
Cytophaga sp. MBIC04684
Protochlamydia naegleriophila
Ruegeria atlantica
Moorella thermoacetica
uncultured SUP05 cluster bacterium
Pedobacter sp. KP-2

## Sheet: Rare species
Details of Shared and Specific rare species in R-SED, M-SED, SR, SW and SG
Common species in R-SED, M-SED, SR, SW and SG	Species only in M-SED	Species only in R-SED	Species only in SR	Species only in SW	Species only in SG
Methylocystis parvus	Bacillus sp. Lgg20.7	Capnocytophaga ochracea	Halobacillus trueperi	Staphylococcus pasteuri	Chromobacterium sp. DS-1
carbazole-degrading bacterium OC11S	Halobacillus karajensis	uncultured Geobacter sp.	Rubritalea sabuli	Escherichia coli	Cyanobacterium sp. MBIC10216
Pedobacter sp. MJ11	Alcaligenes sp. STC1	Pseudaminobacter salicylatoxidans	Tetrasphaera australiensis	Candidatus Cardinium hertigii	Blautia hydrogenotrophica
Acetobacterium carbinolicum	Gordonibacter pamelaeae	Agromyces sp. KY5R	Flavobacterium sp. BH12.12	Synechococcus sp. T7cc1	Deinococcus grandis
Roseobacter denitrificans	Capnocytophaga gingivalis	Rickettsiella grylli	Fusobacterium varium	alpha proteobacterium HIMB114	Aquitalea sp. PGP-1
Flammeovirga aprica	Bacillus sp. Lgg15.4	Treponema pedis	Vibrio harveyi	Burkholderia mimosarum	Rhodomicrobium vannielii
Paracoccus denitrificans	Roseisalinus antarcticus	Bacillus megaterium	Cytophaga sp. I-2029	Eikenella corrodens	Salmonella enterica
Haliangium ochraceum	Enterobacter amnigenus	Sphingomonas sp. TFD44	Azorhizobium doebereinerae	Shewanella putrefaciens	Agromyces salentinus
Prosthecobacter vanneervenii	Acidothermus cellulolyticus	Bacillus cereus	Hirschia baltica	Lactobacillus namurensis	Bacteroides fragilis
Marvinbryantia formatexigens	Microlunatus phosphovorus	Azoarcus tolulyticus	Alcanivorax borkumensis	Peptostreptococcus anaerobius	unidentified cyanobacterium CLg1
Lysinibacillus fusiformis	Salegentibacter salegens	Azoarcus toluvorans	Rhodovulum visakhapatnamense	Spirobacillus cienkowskii	Stanieria sp. PCC 7301
Methylothermus thermalis	Desulfitobacterium hafniense	Agrococcus jenensis	Nocardiopsis composta	Oceanobacter kriegii	Acinetobacter johnsonii
Aerococcus viridans	uncultured Ochrobactrum sp.	Actinoplanes garbadinensis	Methylobacterium sp. 4-46	Leptolyngbya valderiana	Acinetobacter soli
Gemella haemolysans	Acidiphilium cryptum	Vibrio sp. FAL1126	Afifella marina	Candidatus Nitrospira defluvii	Vibrio rotiferianus
Weissella minor	Kluyvera intermedia	Wolbachia pipientis	Leclercia adecarboxylata	Desulfovibrio acrylicus	Spiroplasma floricola
Natranaerobius thermophilus	Vibrio owensii	Schlegelella sp. KB1a	Micromonospora rifamycinica	Thermomonospora curvata	Jannaschia helgolandensis
Spirosoma linguale	Geobacillus sp. RD-2	Alcanivorax venustensis	Cytophaga sp. I-601	Clostridium difficile	Rhodobacterales bacterium CB1025
Lactobacillus murinus	Candidatus Koribacter versatilis	Photobacterium sp. COX	Cardinium endosymbiont of Euides speciosa	Roseomonas cervicalis	Treponema azotonutricium
Rhodococcus opacus	Mycobacterium vanbaalenii	Methylosinus sp. LW4	Stanieria cyanosphaera	endosymbiont of Oligobrachia haakonmosbiensis	Bacteroides tectus
Brevibacillus thermoruber	Bacillus agaradhaerens	Acinetobacter calcoaceticus	Rhodovulum sulfidophilum	unidentified sulfate-reducing bacterium	Desulfovibrio sp. LS2001/01
Desulfonauticus submarinus	Bacillus weihenstephanensis	Vibrio sp. 1B04	Clostridium chauvoei	Clostridium proteolyticum	Acinetobacter radioresistens
Lactobacillus helveticus	Caloramator fervidus	Rhizobium sp. TJ172	Thermanaerovibrio acidaminovorans	Candidatus Magnetobacterium bavaricum	Pseudomonas fluorescens
Acidovorax citrulli	Desulfococcus biacutus	Alcanivorax sp. S2-11	Chryseobacterium gleum	Methylocystis rosea	Leptotrichia trevisanii
Novosphingobium capsulatum	Citrobacter braakii	Mesorhizobium sp. ICMP 12690	Croceibacter atlanticus	Burkholderia multivorans	Vibrio gazogenes
Eubacterium cellulosolvens	Spiroplasma gladiatoris	Yersinia pestis	Chlorobaculum limnaeum	Flavobacterium sp. MSY2	Mycobacterium lepromatosis
Vibrio ichthyoenteri	Bacillus halodurans	Verrucomicrobium spinosum	Chlorobaculum parvum	Synechococcus sp. G4.1	Mycobacterium pulveris
Corynebacterium macginleyi	Bacillus marisflavi	uncultured Verrucomicrobia bacterium	Lactobacillus salivarius	Mesorhizobium chacoense	Oscillatoria sp. PCC 7112
Halanaerobium saccharolyticum	Lactobacillus sp. DCY51	Hoeflea phototrophica	Acetitomaculum ruminis	Desulfobacterium zeppelinii	Enterococcus casseliflavus
Flectobacillus major	Pseudomonas alcaligenes	Corallococcus exiguus	Oxalobacter formigenes	uncultured Desulfobacteraceae bacterium	Oxalicibacterium flavum
Calothrix desertica	Clavibacter michiganensis	Marinobacter santoriniensis	Haemophilus ducreyi	Desulfonatronum lacustre	Crenothrix polyspora
Caldanaerobius polysaccharolyticus	Bacillus sp. PS1	Pseudomonas aeruginosa	Chlorobaculum thiosulfatiphilum	Pseudoalteromonas sp. VHOS4	Rhodobacter changlensis
Burkholderia cepacia	Paenibacillus lentimorbus	Streptomyces sparsogenes	Calothrix parietina	Aster yellows phytoplasma	Desulfovibrio profundus
Enterococcus durans	Pantoea punctata	Methylocystis sp. M	Oscillatoria spongeliae	uncultured Bacteroidetes bacterium	Acinetobacter sp. JB10
Desulfatibacillum alkenivorans	Oligobrachia mashikoi endosymbiont C	Bacillus anthracis	Roseospirillum parvum	Ehrlichia sp. Belluno	Wohlfahrtiimonas chitiniclastica
Pedobacter heparinus	Corynebacterium variabile	Rhodobacter blasticus	Sphingomonas azotifigens	Microbacterium sp. 127Z1	Streptomyces violaceoruber
Terrimonas lutea	Bacteriovorax sp. NZ7	Ochrobactrum anthropi	Desulfobacter postgatei	Vagococcus fluvialis	Selenomonas lacticifex
Desulfotomaculum ruminis	Plesiocystis pacifica	Desulfovibrio halophilus	Vibrionaceae bacterium AVA1	Acetivibrio cellulolyticus	Streptobacillus moniliformis
Corynebacterium pseudogenitalium	Pseudomonas stutzeri	uncultured Enterobacter sp.	Thermovibrio ammonificans	Burkholderia sp. 51-VN6-1W	Thiorhodovibrio winogradskyi
Corynebacterium sp. NML09-0341	Brachybacterium paraconglomeratum	Aggregatibacter actinomycetemcomitans	bacterium SOSP1-142	Pseudoalteromonas rubra	Celerinatantimonas diazotrophica
Corynebacterium sp. NML94-0380	Nocardia cummidelens	Vibrio sp. CAIM 994	Synechococcus sp. PCC 8807	Acinetobacter sp. PAMU-1.11	Treponema maltophilum
Riemerella anatipestifer	Anaerobacillus alkalilacustre	Erythrobacter litoralis	Clostridium indolis	Curtobacterium citreum	Dietzia psychralcaliphila
Eubacterium acidaminophilum	Halobacillus yeomjeoni	Vibrio areninigrae	Oxobacter pfennigii	Arthrobacter sp. 'SMCC G959'	Nocardiopsis gilva
Fusobacterium nucleatum	Staphylococcus equorum	Vibrio hispanicus	Bordetella bronchiseptica	Bifidobacterium minimum	cyanobacterium UCYN-A
Desulfovibrio vulgaris	Lactobacillus kefiri	Actinopolyspora halophila	Desulfobacter latus	Prevotella tannerae	Burkholderia phytofirmans
Enterovibrio coralii	Roseobacter sp. WM2	Mycobacterium montefiorense	Desulfopila aestuarii	unidentified eubacterium SCB49	Zoogloea resiniphila
Flavobacteriaceae bacterium U43	Acidovorax temperans	Trichodesmium erythraeum	Arcobacter halophilus	Synechococcus sp.	Desulfomicrobium escambiense
Paenibacillus borealis	Myxococcus fulvus	methanotroph WI-14	Marichromatium sp. JA328	Synechococcus sp. CC9605	marine proteobacterium 'Tomales Bay wc2-3 lg wh'
Aerococcus sanguinicola	Sorangium cellulosum	Sinorhizobium fredii	Treponema phagedenis	Clostridium hathewayi	Borrelia parkeri
Lactococcus lactis	Campylobacter upsaliensis	Marinobacter sp. NCE312	Corynebacterium auris	marine bacterium SE37	Actinomyces israelii
Clostridium sp. CYP5	Aeromonas schubertii	Thiocapsa marina	Verrucosispora gifhornensis	Neorickettsia sennetsu	Streptomyces filipinensis
Erysipelothrix rhusiopathiae	Oceanimonas sp. Be07	Thiophaeococcus mangrovi	Kribbella sancticallisti	Pandoraea sputorum	Prevotella nanceiensis
Holdemania filiformis	Psychromonas sp. CNPT3	Oleispira antarctica	Synechococcus sp. PCC 8806	Halomonas shengliensis	Synechococcus sp. P2
Rhizobium galegae	Pseudomonas citronellolis	Methylophaga sp. DMS021	Synechocystis sp. Sai002	endosymbiont of Ridgeia piscesae	Oscillatoria sp. MMG-2
Jonesia denitrificans	Vibrio sinaloensis	Photobacterium rosenbergii	Arthrospira fusiformis	Meiothermus chliarophilus	Phormidium ambiguum
Chlamydiales symbiont of Xenoturbella westbladi	Bacillus sp. As3-21	Ochrobactrum sp. T63	Bacillus beijingensis	Weissella cibaria	Pleurocapsa minor
Deinococcus ficus	Paenibacillus anaericanus	methanotroph M13	Bacillus sp. PL-30	Clostridium sordellii	Alicyclobacillus sendaiensis
Ureibacillus thermosphaericus	Paenibacillus glucanolyticus	Desulfobulbus propionicus	Brevibacillus borstelensis	Proteus vulgaris	Eubacterium saburreum
Lactobacillus casei	Syntrophus aciditrophicus	Olavius algarvensis associated proteobacterium Delta 3	Thermoanaerobacter thermocopriae	Psychrobacter jeotgali	Blautia coccoides
Streptococcus mutans	Thioreductor micantisoli	Idiomarina baltica	Sinorhizobium sp. R-25067	Vibrio sp. 0908	butyrate-producing bacterium SM4/1
uncultured Achromobacter sp.	Vibrio breoganii	Thiohalophilus thiocyanatoxydans	Azospirillum irakense	Pseudomonas cissicola	Thalassospira sp. MCCC 1A01288
Francisella philomiragia	Corynebacterium bovis	Saccharomonospora azurea	Rhodospirillum centenum	Methylacidiphilum kamchatkense	Thalassospira sp. MCCC 1A01318
Photobacterium leiognathi	Propionibacterium acnes	Collinsella stercoris	Geobacter sp. Ply4	Brevibacterium helvolum	Thalassospira sp. MCCC 1A01423
Lamellibrachia sp. endosymbiont	Bacillus alcalophilus	Synechococcus sp. MA0607J	Helicobacter mustelae	Corynebacterium jeikeium	Thalassospira sp. MCCC 1A01449
	Bacillus selenitireducens	Streptococcus cristatus	Actinobacillus genomosp. 1	Corynebacterium tuscaniense	alpha proteobacterium F16
	Lactobacillus saerimneri	Dialister micraerophilus	Hydrogenovibrio marinus	Rothia mucilaginosa	Thiomonas sp. WJ68
	Streptococcus gallolyticus	Syntrophobacter wolinii	Spirochaeta aurantia	Mycobacterium diernhoferi	Legionella sainthelensi
	Eubacterium saphenum	Micrococcus lylae	Glycomyces harbinensis	Rhodococcus corynebacterioides	Legionella sp. CDC-3041-AUS-E
	Desulfotomaculum geothermicum	Tsukamurella pulmonis	Kineococcus radiotolerans	Atopobium vaginae	Halomonas halophila
	Ilyobacter tartaricus	Conexibacter woesei	Nesterenkonia sp. 10004	Synechococcus sp. RS9914	Vibrio proteolyticus
	Sinorhizobium sp. TJ170	Sulfurihydrogenibium sp. Y04ANG1	Mycobacterium chelonae	Virgibacillus sp. JM-Vb	Mycobacterium kansasii
	alpha proteobacterium BAL199	Clostridium purinilyticum	Nocardiopsis xinjiangensis	Desulfovibrio indonesiensis	Kribbella solani
	Erwinia sp. SK-30-7	Sphingomonas sp. DS3-1	Pseudonocardia yunnanensis	Aeromonas salmonicida	Bacteroides vulgatus
	Propionibacteriaceae bacterium MOB600	Alteromonas sp. X3	Kitasatospora cheerisanensis	Pseudoalteromonas sp. NO3	Porphyromonas endodontalis
	Nodularia spumigena	Shewanella hanedai	Kitasatospora griseola	Candidatus Solibacter usitatus	Porphyromonas gingivicanis
	Bacillus sp. FO-011	Bisgaard Taxon 14	Chryseobacterium haifense	Microbacterium arabinogalactanolyticum	Cardinium endosymbiont of Culicoides arakawae
	Bacillus sp. TA2.A1	Acinetobacter lwoffii	Flavobacteriales bacterium ALC-1	Arthrobacter sp. FB24	Chloroherpeton thalassium
	Virgibacillus proomii	Vibrio sp. MA35	Flavobacteria bacterium MS024-3C	Mycobacterium aurum	Cyanobacterium sp. LLi5
	Brevibacillus choshinensis	Fervidobacterium nodosum	Chlorobaculum tepidum	Nocardioides sp. CF8	Anabaena azotica
	Staphylococcus felis	Corynebacterium sp. 25850	Gloeothece membranacea	Blattabacterium sp. (Periplaneta americana)	Nostoc ellipsosporum
	Trichococcus flocculiformis	Turicella otitidis	Synechococcus sp. G11	Brochothrix thermosphacta	Terribacillus halophilus
	Enterococcus saccharolyticus	Sphingobacterium sp. PM2-P1-29	Synechococcus sp. PS838	Acidovorax facilis	Staphylococcus carnosus
	Clostridium sp. L2-50	Bacillus sp. GB02-2A	Nostoc sp. PCC 7120	Desulfobulbus sp. DSM 2033	Lactobacillus hamsteri
	Bartonella sp. Shimane 84-1	Staphylococcus pettenkoferi	Oscillatoria sp. CCAP 1459/13	uncultured Desulfobulbus sp.	uncultured Clostridium sp.
	Candidatus Bartonella rudakovii	Butyribacterium methylotrophicum	Bacillus catenulatus	Legionella cincinnatiensis	Tissierella sp. LBN 291
	Achromobacter xylosoxidans	Rhodovulum imhoffii	Bacillus clarkii	bacterium py116	Lachnospiraceae bacterium A4
	Candidatus Blochmannia schaefferi	Desulfobacterium indolicum	Bacillus sp. TB104	Actinomyces sp. oral taxon 848	Ruminococcus flavefaciens
	Enterobacter helveticus	Helicobacter felis	Paenibacillus sp. A-234	Brevibacterium epidermidis	Clostridium innocuum
	Serratia rubidaea	Pseudoalteromonas sp. 'A1 isolate-2'	Thermoactinomyces intermedius	Corynebacterium ammoniagenes	Prosthecomicrobium pneumaticum
	Acinetobacter towneri	Thiohalocapsa halophila	Lactobacillus gasseri	Corynebacterium kroppenstedtii	Mesorhizobium sp. RPJ16
	Psychrobacter faecalis	Halothiobacillus sp. HL1	Cellulosilyticum ruminicola	Leifsonia xyli	Mesorhizobium sp. RPJ6
	Photobacterium aplysiae	Alcanivorax sp. Haw1	Bradyrhizobium yuanmingense	Arthrobacter sp. 'SMCC G965'	marine bacterium GAI-109
	Vibrio sp. 12F05	Photobacterium sp. JT-ISH-224	Diaphorobacter nitroreducens	Arthrobacter sp. AD30	Sphingomonas agrestis
	Treponema sp.	Vibrio fluvialis	Roseateles terrae	Mycobacterium goodii	Cupriavidus sp. SWF66166
	Pseudoclavibacter helvolus	Leptonema illini	Burkholderiales bacterium ITSI70	Nocardiopsis kunsanensis	Alicycliphilus denitrificans
	Renibacterium salmoninarum	uncultured Acidobacteria bacterium	uncultured Thiobacillus sp.	Bifidobacterium adolescentis	Comamonas kerstersii
	Propionibacterium acidipropionici	Gordonia malaquae	Bacteriovorax sp. MNZ4	Prevotella bergensis	Hydrogenophaga pseudoflava
	Dehalococcoides sp. VS	Micromonospora viridifaciens	Geobacter metallireducens	Prevotella oris	Neisseria pharyngis
	Bacillus sp. GB02-14C	Mycobacterium austroafricanum	Helicobacter cf. pullorum	Chryseobacterium balustinum	Desulfovibrio giganteus
	Bacillus sp. H-18	Mycobacterium farcinogenes	Helicobacter pullorum	Flavobacterium sp. PAMU-2.98	Nitratiruptor tergarcus
	Bacillus sp. PL-7	Mycobacterium gordonae	Alteromonas sp. UST981101-023	Microcystis flos-aquae	Thioalkalivibrio denitrificans
	Bacillus sp. S210	Mycobacterium sp. GN-11124	Allochromatium sp. MTCH3IM086	Calothrix sp. PCC 7103	Thiohalospira alkaliphila
	Bacillus sp. US149	Streptomyces nogalater	Nitrosococcus watsoni	Bacillus circulans	Enterobacter pulveris
	Staphylococcus warneri	Bifidobacterium saeculare	Thioalkalivibrio thiocyanodenitrificans	Geobacillus thermoleovorans	Pectobacterium carotovorum
	Lactobacillus coryniformis	Bacillus amyloliquefaciens	Methylophaga marina	Lactobacillus amylolyticus	Legionella cherrii
	Fructobacillus ficulneus	Dehalobacter sp. WL	Xylella fastidiosa	Streptococcus peroris	Vibrio sp. FAL1151
	Fusobacterium mortiferum	Chelativorans sp. BNC1	Congregibacter litoralis	Caldicellulosiruptor saccharolyticus	Treponema sp. Ru1
	Aminobacter ciceronei	Stappia stellulata	Methylonatrum kenyense	Selenomonas sputigena	Corynebacterium cystitidis
	Bordetella pertussis	Erythrobacter sp. SD-21	Calyptogena ponderosa endosymbiont	Telluria mixta	Microbacterium hydrocarbonoxydans
	uncultured Cupriavidus sp.	Nitrosomonas sp. N2005	Mycoplasma crocodyli	Desulfovibrio sp. TBP-1	Rhodococcus pyridinivorans
	Neisseria canis	Desulfovibrio oxamicus	Mycoplasma sp. Mirounga ES2774-NASSP4	Pseudoalteromonas sp. KMM 701	Kribbella swartbergensis
	Desulfofustis glycolicus	Chromatium okenii		Pseudoalteromonas sp. R-231	Pseudonocardia saturnea
	Desulfotalea psychrophila	Neptuniibacter sp. antisso-13		Chromohalobacter marismortui	Streptomyces fimicarius
	Chromatiaceae bacterium G8	Photobacterium ganghwense		Halomonas nitroreducens	Streptomyces flavofuscus
	Cronobacter malonaticus	Treponema amylovorum		Vibrio sp. PP-204	Bifidobacterium animalis
	Hafnia alvei	Gordonia neofelifaecis		Corynebacterium massiliense	Bacteroides nordii
	Yersinia massiliensis	Catenuloplanes japonicus		Corynebacterium sp. 59614	Prevotella denticola
	Vibrio sp. F82	Mycobacterium flavescens		Corynebacterium sp. NML00-0156	Zobellia galactanivorans
	Rubritalea sp. MN1-1042	Rhodococcus marinonascens		Mycobacterium sp. XN10-17	Chloroflexus sp. Y-400-fl
	Actinomyces viscosus	Pseudonocardia hydrocarbonoxydans		Streptomyces indiaensis	Synechococcus sp. LS0417
	Agromyces fucosus	Streptomyces caeruleus		Polaribacter irgensii	Synechococcus sp. OH2
	Agromyces luteolus	Streptomyces sp.		Deinococcus radiophilus	Planktothrix pseudagardhii
	Mycobacterium triplex	Cryptobacterium curtum		Geobacillus uzenensis	Alicyclobacillus pohliae
	Paraprevotella xylaniphila	Flexistipes sinusarabici		Listeria grayi	Bacillus sp. HYC-1-3
	Prevotella veroralis	Virgibacillus marismortui		Macrococcus caseolyticus	Bacillus thermoamylovorans
	Pedobacter sp. BAL39	Lactobacillus aviarius		Enterococcus canintestini	Kurthia zopfii
	Synechococcus sp. HOG	Clostridium aminovalericum		Lactobacillus johnsonii	Enterococcus avium
	Alicyclobacillus acidiphilus	Clostridium sp. enrichment culture clone 7-25		Lactobacillus paracollinoides	Enterococcus columbae
	Alicyclobacillus acidoterrestris	Anaerococcus prevotii		Eubacterium fissicatena	Lactobacillus leichmannii
	Anoxybacillus sp. FB6	Rhodovulum robiginosum		Anaerostipes caccae	Pediococcus pentosaceus
	Bacillus atrophaeus	Gluconacetobacter diazotrophicus		Pseudobutyrivibrio xylanivorans	Clostridium cadaveris
	Bacillus badius	Azospirillum sp. TSA63w		Catenibacterium mitsuokai	Clostridium hungatei
	Bacillus horikoshii	Phaeospirillum fulvum		Parvibaculum sp. S13-5	Clostridium leptum
	Bacillus sp. JAMB-204	marine magnetite-containing magnetic spirillum MMS-1		Sphingomonas sp. BR12254	Clostridium sp. MLG661
	Bacillus sp. JB99	Alcaligenes sp.		Bordetella sp. As3-3	Clostridium sp. MLG856-1
	Bacillus sp. KSM-9865	Comamonas sp. 46		Ralstonia sp. OV225	Clostridium symbiosum
	Bacillus sp. NRRL B-14911	Methylovorus sp. SIP3-4		Neisseria cinerea	Eubacterium hallii
	Bacillus sp. SG607	Desulfovibrio portus		Pantoea dispersa	Catonella morbi
	Virgibacillus carmonensis	Alteromonas sp.		Proteus hauseri	Oribacterium sinus
	Paenibacillus alginolyticus	Idiomarina loihiensis		Alcanivorax sp. PR-1	Desulfotomaculum halophilum
	Paenibacillus durus	Halothiobacillus sp. HL27		Alcanivorax sp. S15-9	Syntrophomonas curvata
	Paenibacillus taichungensis	Salmonella bongori		Halomonas variabilis	Caldicellulosiruptor bescii
	Paenibacillus zanthoxyli	Haemaphysalis longicornis symbiont 47		Acinetobacter gerneri	Thermodesulfobium narugense
	Sporosarcina saromensis	Gallibacterium anatis		Psychrobacter pacificensis	Megasphaera micronuciformis
	Staphylococcus caprae	Phocoenobacter uteri		Photobacterium sp. R-13	Gemmatimonas aurantiaca
	Staphylococcus devriesei	Acinetobacter baumannii		Vibrio nigripulchritudo	Brevundimonas bullata
	Staphylococcus lentus	Mycoplasma glycophilum		Vibrio sp. FAL1146	Mycoplana bullata
	Tetragenococcus halophilus	Thermodesulfatator sp. AT1325		bacterium enrichment culture clone N47	Hyphomicrobium vulgare
	Lactobacillus crispatus	Chthoniobacter flavus		Corynebacterium genitalium	Azorhizobium caulinodans
	Lactobacillus gallinarum	Candidatus Chloracidobacterium thermophilum		Corynebacterium glucuronolyticum	Labrenzia aggregata
	Lactobacillus jensenii	Actinomyces oris		Corynebacterium lipophiloflavum	Roseobacter sp. SL25
	Lactobacillus mali	Actinokineospora riparia		Corynebacterium mastitidis	Sulfitobacter pontiacus
	Lactococcus garvieae	Corynebacterium casei		Corynebacterium pseudodiphtheriticum	Azospirillum amazonense
	Clostridium cochlearium	Corynebacterium diphtheriae		Corynebacterium sp. NML96-0085	Anaplasma centrale
	Clostridium sporogenes	Corynebacterium imitans		Gordonia bronchialis	Holospora obtusa
	Desulfotomaculum alkaliphilum	Corynebacterium renale		Candidatus Aquiluna rubra	Rickettsia akari
	Desulfotomaculum luciae	Corynebacterium riegelii		Cryobacterium psychrophilum	Novosphingobium nitrogenifigens
	Halanaerobium congolense	Microbacterium esteraromaticum		Microbacterium chocolatum	Burkholderia sp. PTK47
	Bradyrhizobium sp.	Microbacterium resistens		Microbacterium liquefaciens	Limnobacter sp. 83
	Bradyrhizobiaceae bacterium N106a	Arthrobacter globiformis		Mycobacterium frederiksbergense	Herbaspirillum sp. TSA50y
	Methylobacterium radiotolerans	Arthrobacter sp. PNP1		Mycobacterium genavense	Roseateles depolymerans
	Methylocystis hirsuta	Nesterenkonia aethiopica		Rhodococcus sp. SoF	Bacteriovorax stolpii
	Erythrobacter sp. JL-310	Actinoplanes missouriensis		Pseudonocardia sp. AL040410-06	Bdellovibrio sp. JSS
	Burkholderia pyrrocinia	Micromonospora sp. SB1-39		Saccharopolyspora erythraea	Desulfobacterium vacuolatum
	Burkholderia sp.	Mycobacterium fallax		Prevotella albensis	Anaeromyxobacter sp. K
	Cupriavidus sp. amp18	Mycobacterium intracellulare		Prevotella corporis	Sulfurospirillum barnesii
	Cupriavidus taiwanensis	Mycobacterium mucogenicum		Prevotella nigrescens	Helicobacter acinonychis
	Acidovorax konjaci	Mycobacterium phlei		Cytophaga sp. I-1856	Nautilia lithotrophica
	Aquincola tertiaricarbonis	Mycobacterium sp. FL04-42-151SpA		Chryseobacterium indologenes	Succinivibrio dextrinosolvens
	Thiomonas arsenivorans	Nocardioides aromaticivorans		Flavobacterium hercynium	Ferrimonas sp. A3B-64-2
	Bacteriovorax sp. COCO1A	Nocardiopsis rosea		Riemerella columbina	Moritella viscosa
	Desulfovibrio fructosovorans	Prauserella rugosa		Chitinophaga sancti	Thiorhodospira sp. SLG
	Desulfovibrio sp. LVS-13	Streptomyces aurantiacus		Oscillochloris trichoides	Halothiobacillus kellyi
	Campylobacter sp.	Streptomyces caelestis		Geitlerinema sp. PCC 8501	Buttiauxella agrestis
	Nitratifractor salsuginis	Streptomyces hygroscopicus		Deinococcus deserti	Cronobacter dublinensis
	Ferrimonas sp. A3B-57-2	Streptomyces ornatus		Geobacillus caldoproteolyticus	Erwinia pyrifoliae
	Enterobacter ludwigii	Streptomyces parvus		Geobacillus thermocatenulatus	Klebsiella sp.
	Proteus penneri	Streptomyces toxytricini		Ornithinibacillus californiensis	Pectobacterium cypripedii
	Yersinia frederiksenii	Nonomuraea recticatena		Paenibacillus glacialis	Xenorhabdus poinarii
	Yersinia pseudotuberculosis	Bifidobacterium psychraerophilum		Staphylococcus capitis	Legionella brunensis
	Pasteurella mairii	Hymenobacter antarcticus		Staphylococcus simulans	Legionella sp. NML 93L054
	Moraxella catarrhalis	Sphingobacterium sp. 62		Gemella morbillorum	Legionella waltersii
	Pseudomonas plecoglossicida	Cyanothece sp. WH 8902		Enterococcus italicus	Legionella worsleiensis
	Pseudomonas rhodesiae	Synechococcus sp. UH7		Lactobacillus fermentum	Methylohalobius crimeensis
	Photobacterium indicum	Nostoc linckia		Lactobacillus ruminis	Actinobacillus muris
	Vibrio ezurae	Pseudanabaena sp. PCC 7403		Lactococcus plantarum	Pseudomonas orientalis
	Vibrio pacinii	Bacillus sp. M118		Anaerococcus lactolyticus	Vibrio sp. FALF181
	Vibrio sp. UST010723-010	uncultured Bacillus sp.		Roseburia faecis	Vibrio sp. R-91
	marine proteobacterium 'Bird Shoal 6-2'	Paenibacillus campinasensis		Veillonella ratti	Leptospira fainei
	Pseudomonas sp.	Pasteuria penetrans		planctomycete Zi62	Acholeplasma multilocale
	Mycoplasma gallinarum	Pullulanibacillus naganoensis		Methylobacterium lusitanum	Spiroplasma lampyridicola
	Mycoplasma pirum	Atopostipes suicloacalis		Methylobacterium rhodesianum	Mycoplasma cavipharyngis
	Mycoplasma spermatophilum	Lactobacillus dextrinicus		Methylopila capsulata
	bacterium OGmD5	Leuconostoc citreum		Xanthobacter sp. AS1
		Oenococcus oeni		Loktanella sp. NP29
		Streptococcus infantis		Oceanibulbus indolifex
		Clostridium haemolyticum		Thalassospira lucentensis
		Clostridiaceae bacterium K10		Candidatus Pelagibacter sp. HTCC7211
		Anaerococcus hydrogenalis		Candidatus Pelagibacter ubique
		Sporanaerobacter acetigenes		magnetite-containing magnetic vibrio
		Bacteroides cellulosolvens		Burkholderia sp. SOD-5b
		Bulleidia extructa		Burkholderia tuberum
		Rhodopirellula sp. SM31		Ralstonia sp. 3-VN9-1W
		Ochrobactrum intermedium		Ralstonia sp. ISSDS-784
		Pseudochrobactrum asaccharolyticum		Neisseria sp. GSR70
		uncultured Methylobacterium sp.		Geobacter humireducens
		Paracoccus methylutens		uncultured Helicobacter sp.
		Azospirillum sp. TSA16		Aeromonas sharmana
		Azospirillum sp. TSA20c		Oceanimonas doudoroffii
		Anaplasma platys		Alteromonas sp. UST981101-024
		Ralstonia pickettii		Marinobacter lipolyticus
		Ralstonia solanacearum		Thioalkalibacter halophilus
		Comamonas sp. R-28231		Serratia symbiotica
		Duganella violaceinigra		Alcanivorax sp. S17-8
		Neisseria subflava		Halomonas arcis
		Nitrosomonas sp. C-56		Halomonas cerina
		Nitrosovibrio sp. FJI82		Oceanospirillum multiglobuliferum
		Myxococcus virescens		Actinobacillus suis
		Aeromonas veronii		Haemophilus parahaemolyticus
		Bowmanella pacifica		Acinetobacter schindleri
		Marinobacter flavimaris		Acinetobacter sp. PND-4
		Marinobacterium jannaschii		Acinetobacter sp. VKPM14
		Shewanella fidelis		Pseudomonas sp. BW11M1
		Shewanella livingstonensis		Pseudomonas umsongensis
		Shewanella marisflavi		Photobacterium sp. R-34
		Allochromatium sp. AX1YPE		Vibrio chagasii
		Alkalilimnicola ehrlichii		Vibrio sp. 12G12
		Alkalispirillum sp. ACO4		Vibrio sp. 14C03
		Alkalispirillum sp. ACO5		Vibrio sp. 7G10
		Ectothiorhodospira sp. LO12		Vibrio sp. FALF255
		Plesiomonas shigelloides		Pseudoxanthomonas sp. ITRH31
		Rahnella sp. 121-Celery		Citrus greening disease-associated bacterium
		Xenorhabdus griffiniae		endosymbiont Suiyo-Bathy-1 of Myrina sp. HEE-2004
		Halomonas meridiana		Brinjal little leaf phytoplasma
		Bermanella marisrubri		Coconut lethal yellowing phytoplasma
		Haemophilus haemolyticus
		Francisella sp. MA067296
		Photobacterium sp. R-89
		Vibrio rumoiensis
		Vibrio sp. WH134
		Mycoplasma anatis
		Mycoplasma bovirhinis
		Thermosipho africanus
		Thermotoga subterranea
		endosymbiont of Ifremeria nautilei
